# Supplementary material for: Prospectively Predicting Adult Depressive Symptoms from Adolescent Peer Dysfunction: a Sibling Comparison Study
Source: Springer Nature journal article supplement (doi:10.1007/s10802-022-00906-4), 2022-02-18
Supplement: 10802_2022_906_MOESM1_ESM.pdf [file 10802_2022_906_MOESM1_ESM.pdf]

*Table S1. Example raw and family-centered peer dysfunction scores.*

| Family | Sibling | Raw Score | Family Average | Family-Centered Peer Dysfunction Score |
|--------|---------|-----------|----------------|----------------------------------------|
| 1      | A       | 1         | 3              | -2                                     |
| 1      | B       | 5         | 3              | 2                                      |
| 2      | A       | 8         | 4              | 4                                      |
| 2      | B       | 3         | 4              | -1                                     |
| 2      | C       | 1         | 4              | -3                                     |
| 3      | A       | 5         | 6              | -1                                     |
| 3      | B       | 7         | 6              | 1                                      |
| 4      | A       | 2         | 4.5            | -2.5                                   |
| 4      | B       | 4         | 4.5            | -0.5                                   |
| 4      | C       | 3         | 4.5            | -1.5                                   |
| 4      | D       | 9         | 4.5            | 4.5                                    |

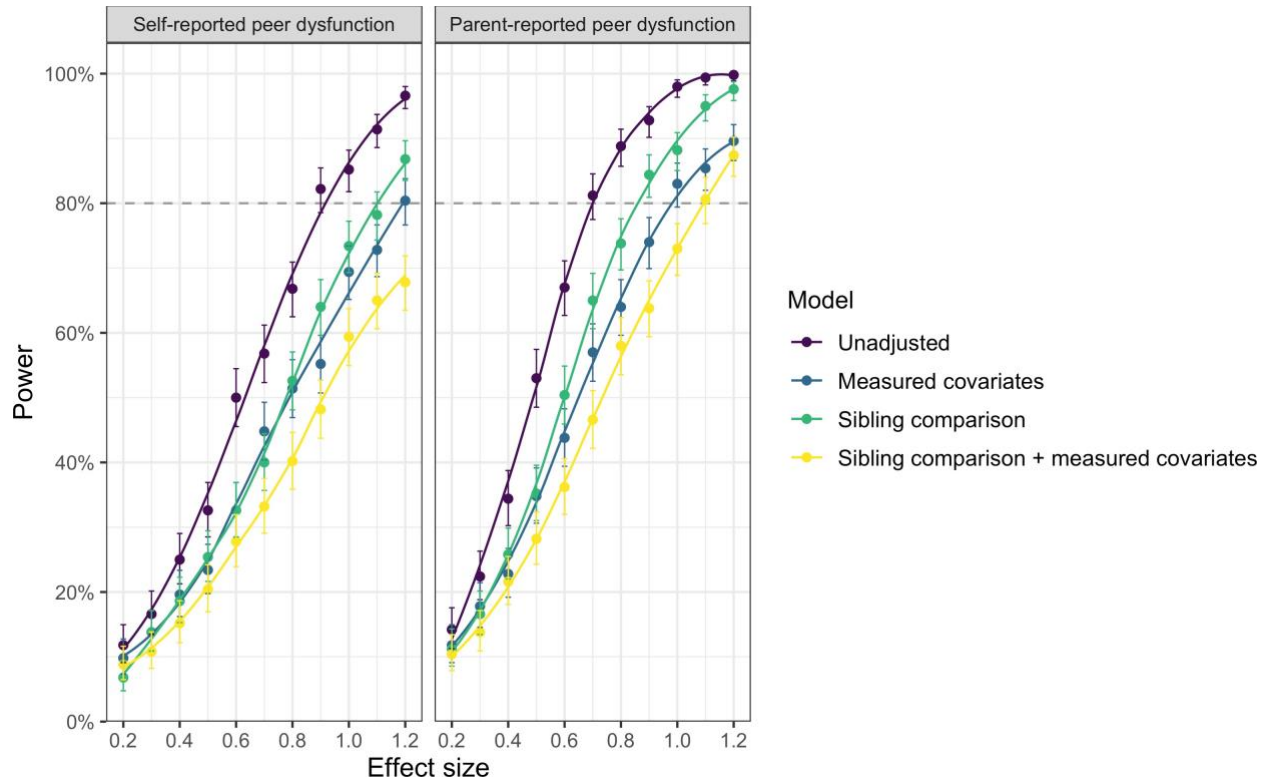

*Figure S1.* Results of simulation-based sensitivity analyses of the effect of self-reported (left) or parent-reported (right) adolescent peer dysfunction on adult depression.

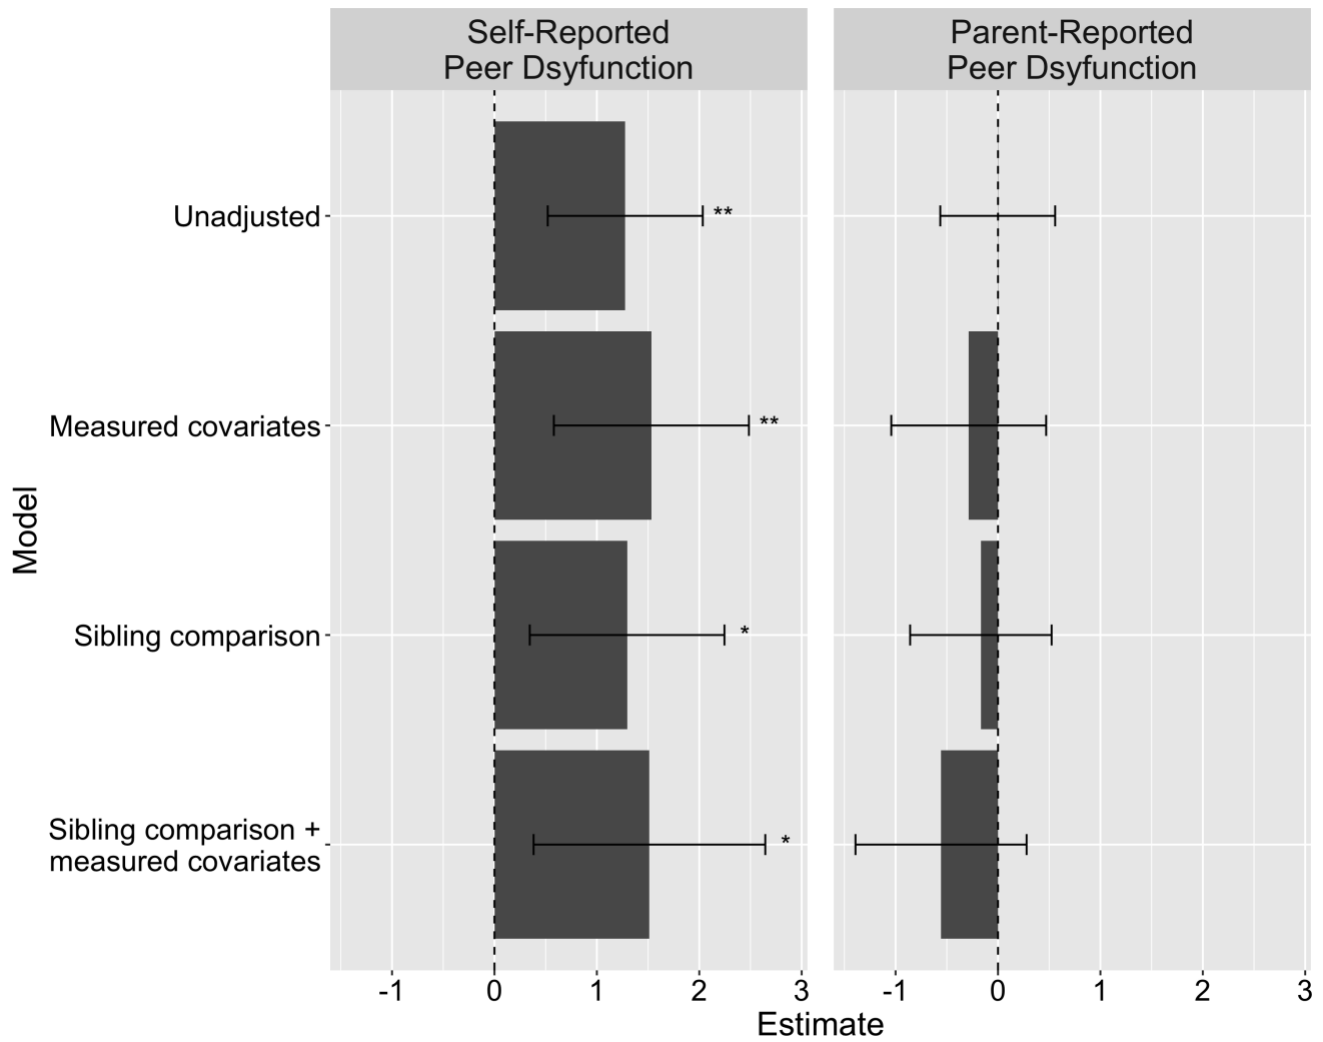

*Figure S2.* The unique unstandardized effects of self-reported (left) versus parent-reported (right) adolescent peer dysfunction on adult depressive symptoms. Error bars represent 95% confidence intervals. \*  $p < .05$  \*\*  $p < .01$  \*\*\*  $p < .001$

**A**

Which peer dysfunction rater(s) were included in the model?

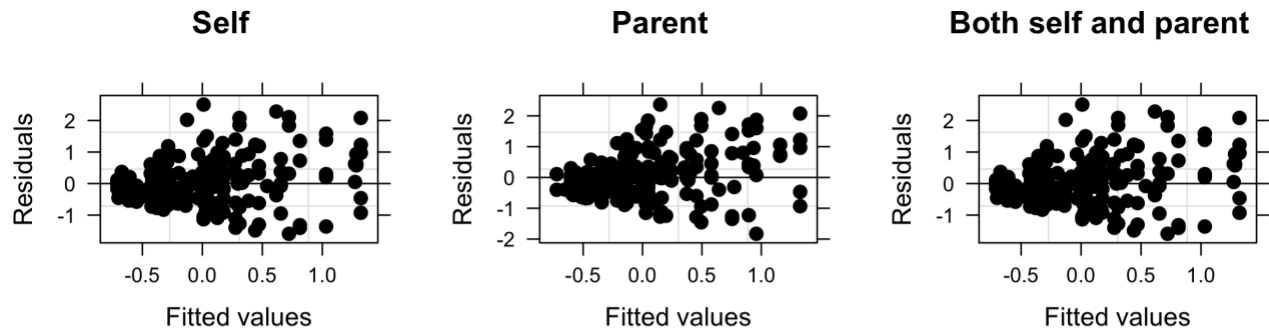**B**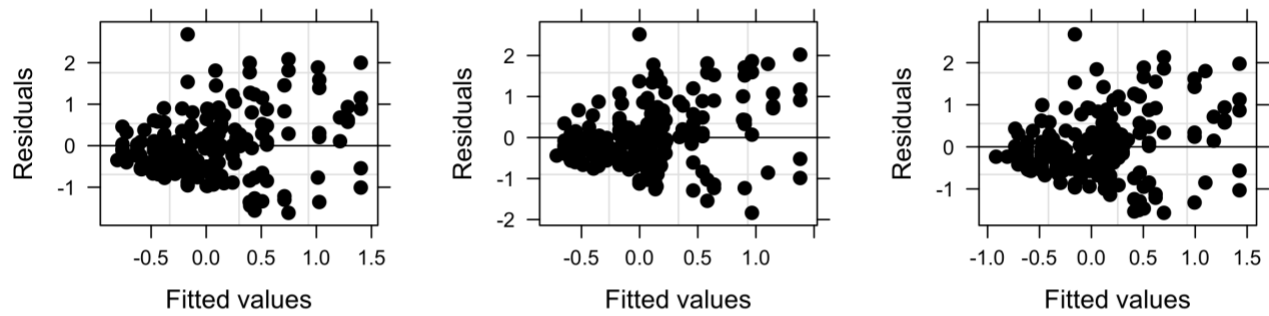**C**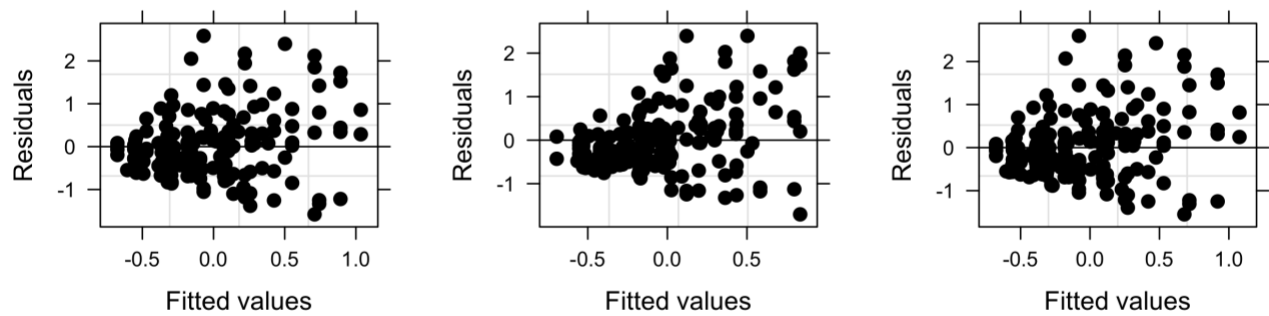**D**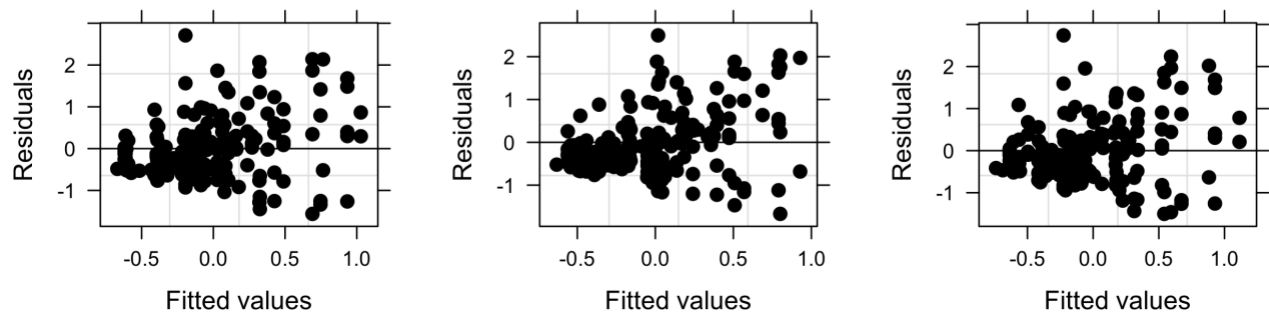

*Figure S3.* Plots of model fitted values versus residuals for the unadjusted (A), measured covariates (B), sibling comparison (C), and sibling comparison + measured covariates (D) models. Dots spread equally or randomly around the horizontal line indicates homoskedasticity.

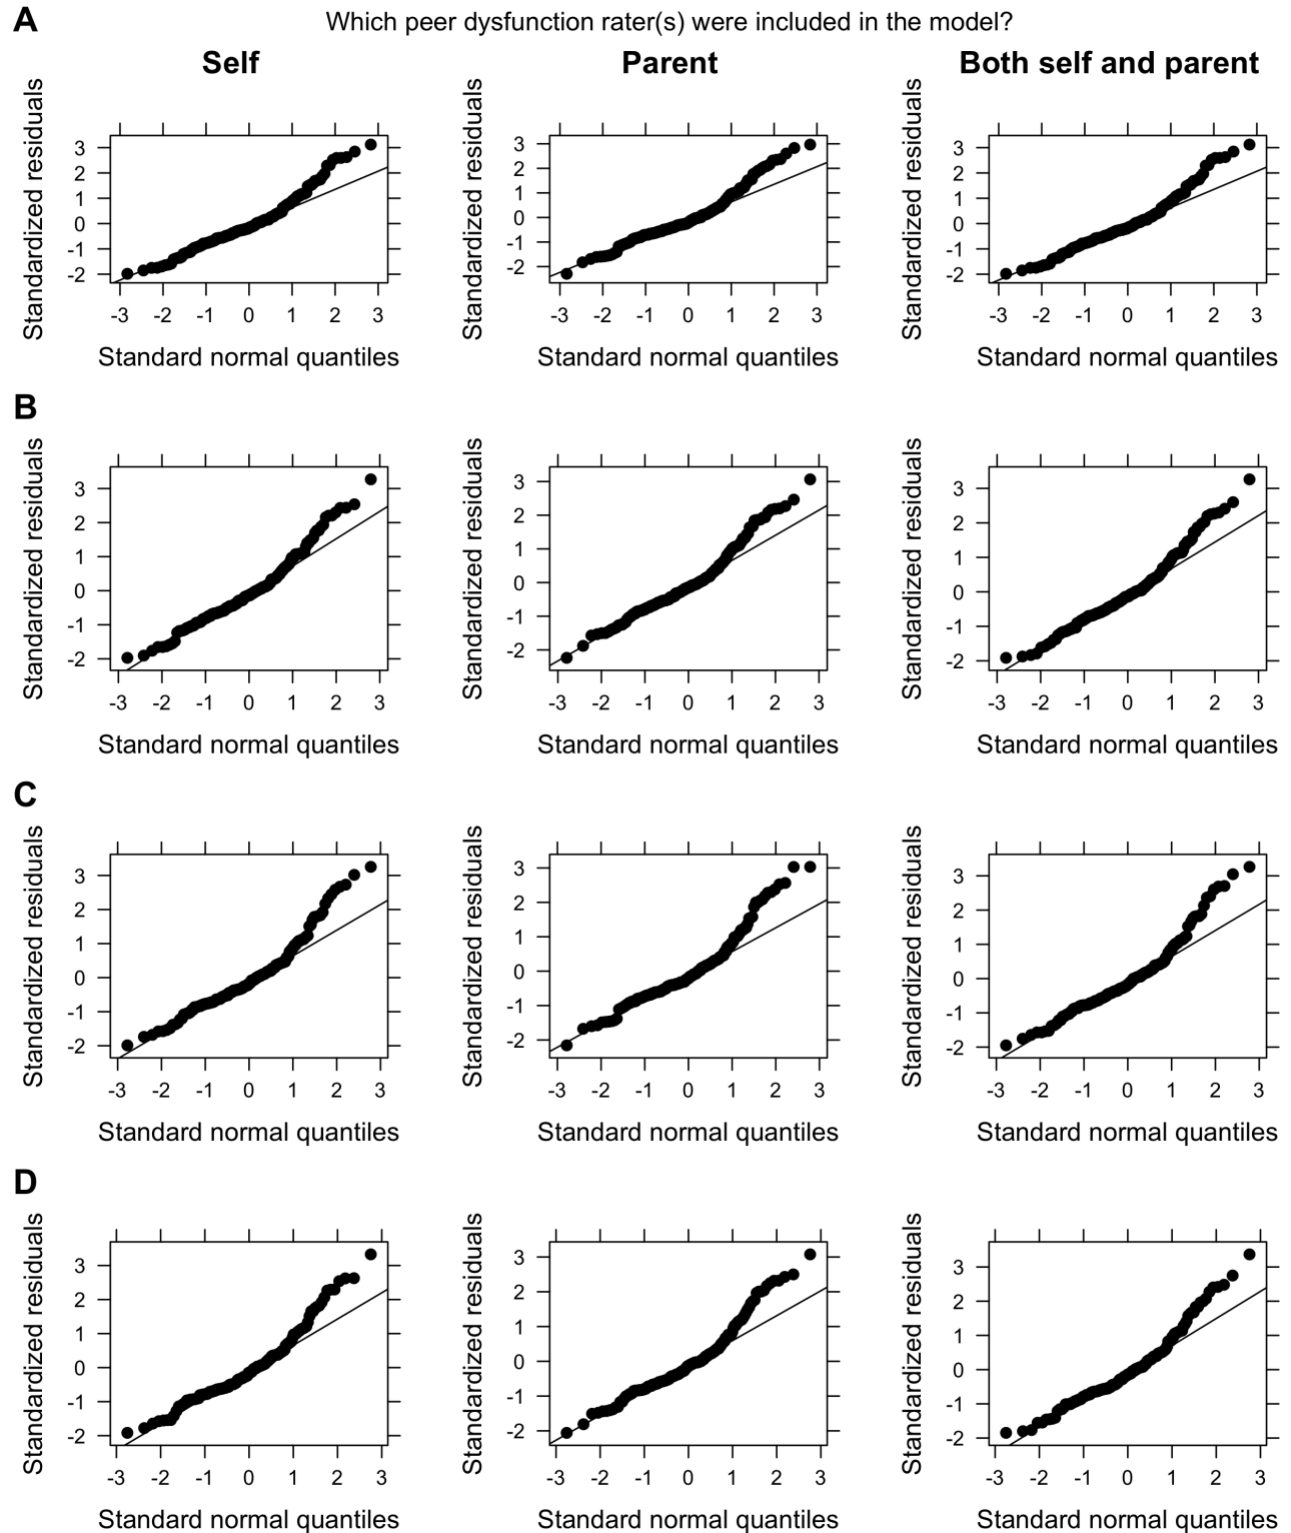

*Figure S4.* QQ plots visualizing the normality of residuals for the unadjusted (A), measured covariates (B), sibling comparison (C), and sibling comparison + measured covariates (D) models.

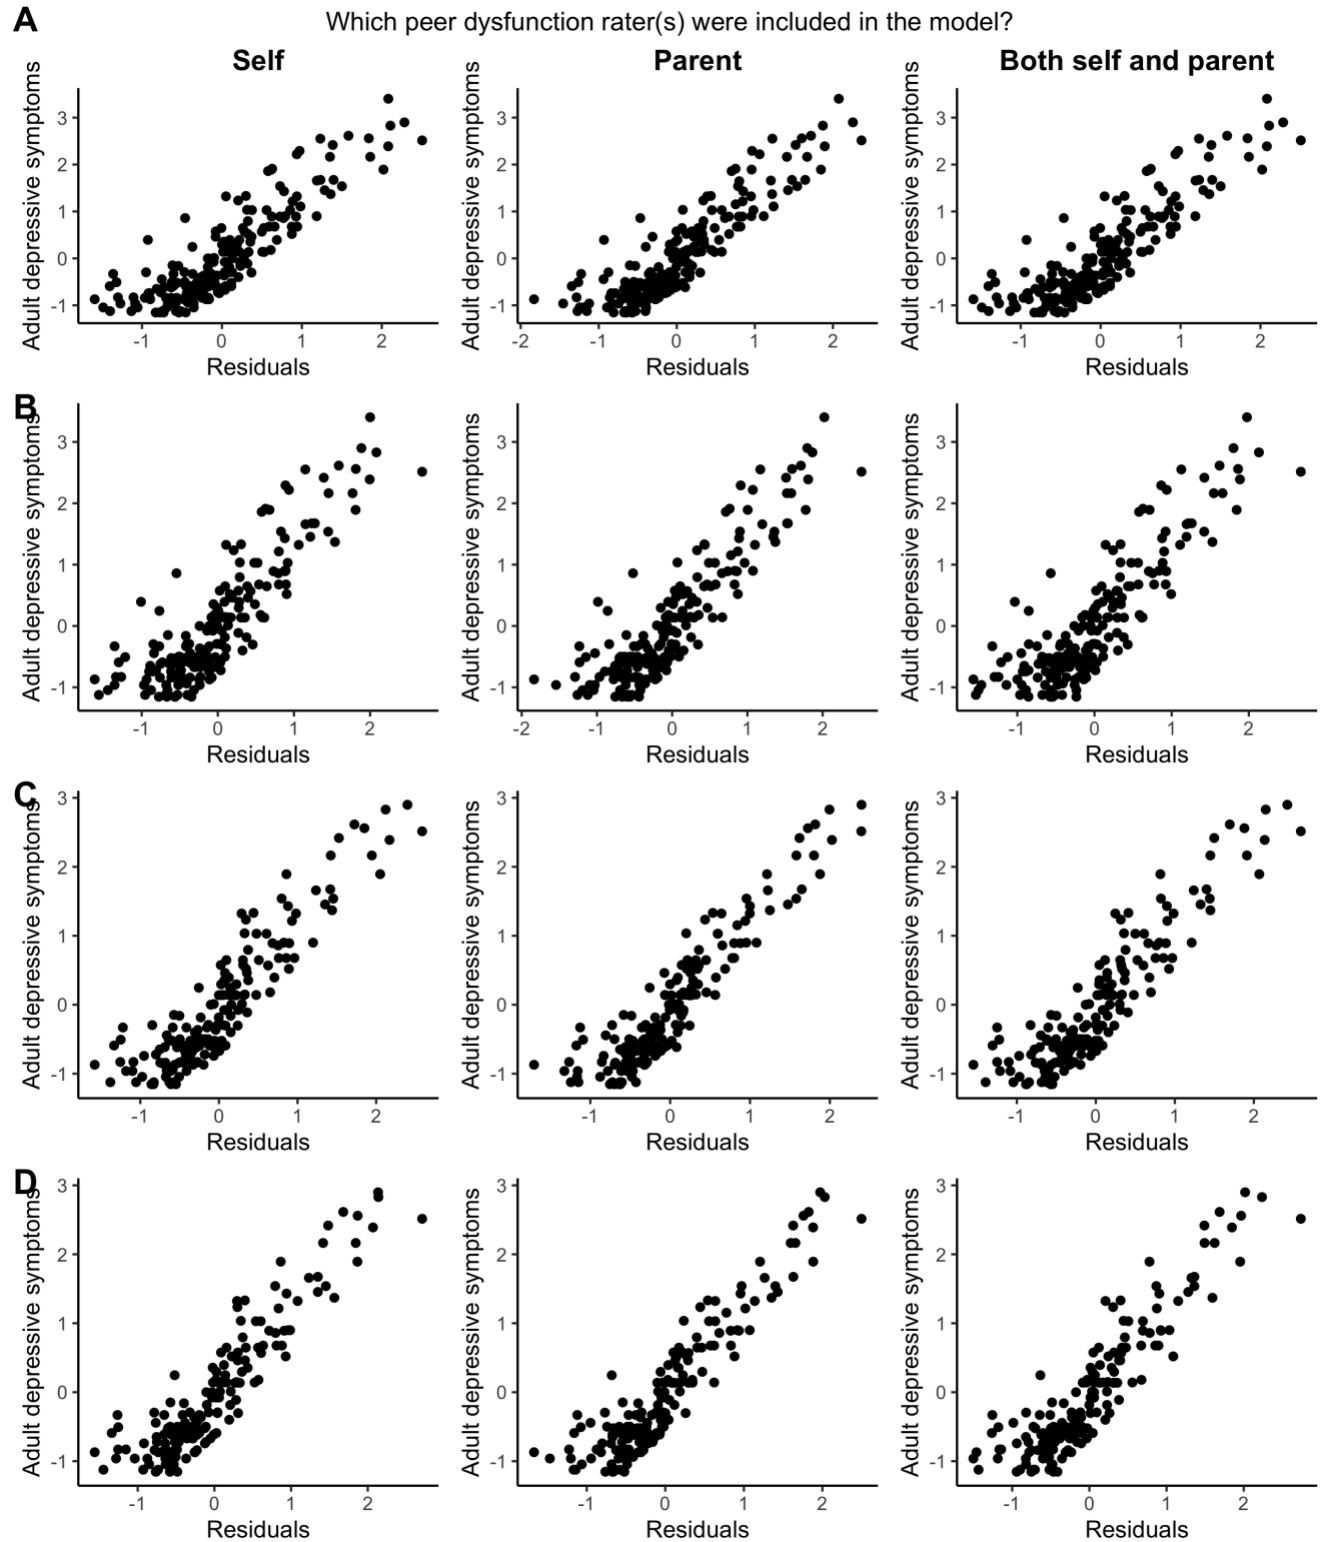

*Figure S5.* Plots of residuals versus the observed outcome (i.e., adult depressive symptoms) for the unadjusted (A), measured covariates (B), sibling comparison (C), and sibling comparison + measured covariates (D) models.
